# Supplementary material for: Assessment of Cannabidiol and Δ9-Tetrahydrocannabiol in Mouse Models of Medulloblastoma and Ependymoma
Source: MDPI journal article supplement (doi:10.3390/cancers13020330), 2021-01-18
Supplement: s1 [file s1]

Supplementary information – IMMUNOBLOTS USED IN THE GENERATION OF FIGURES

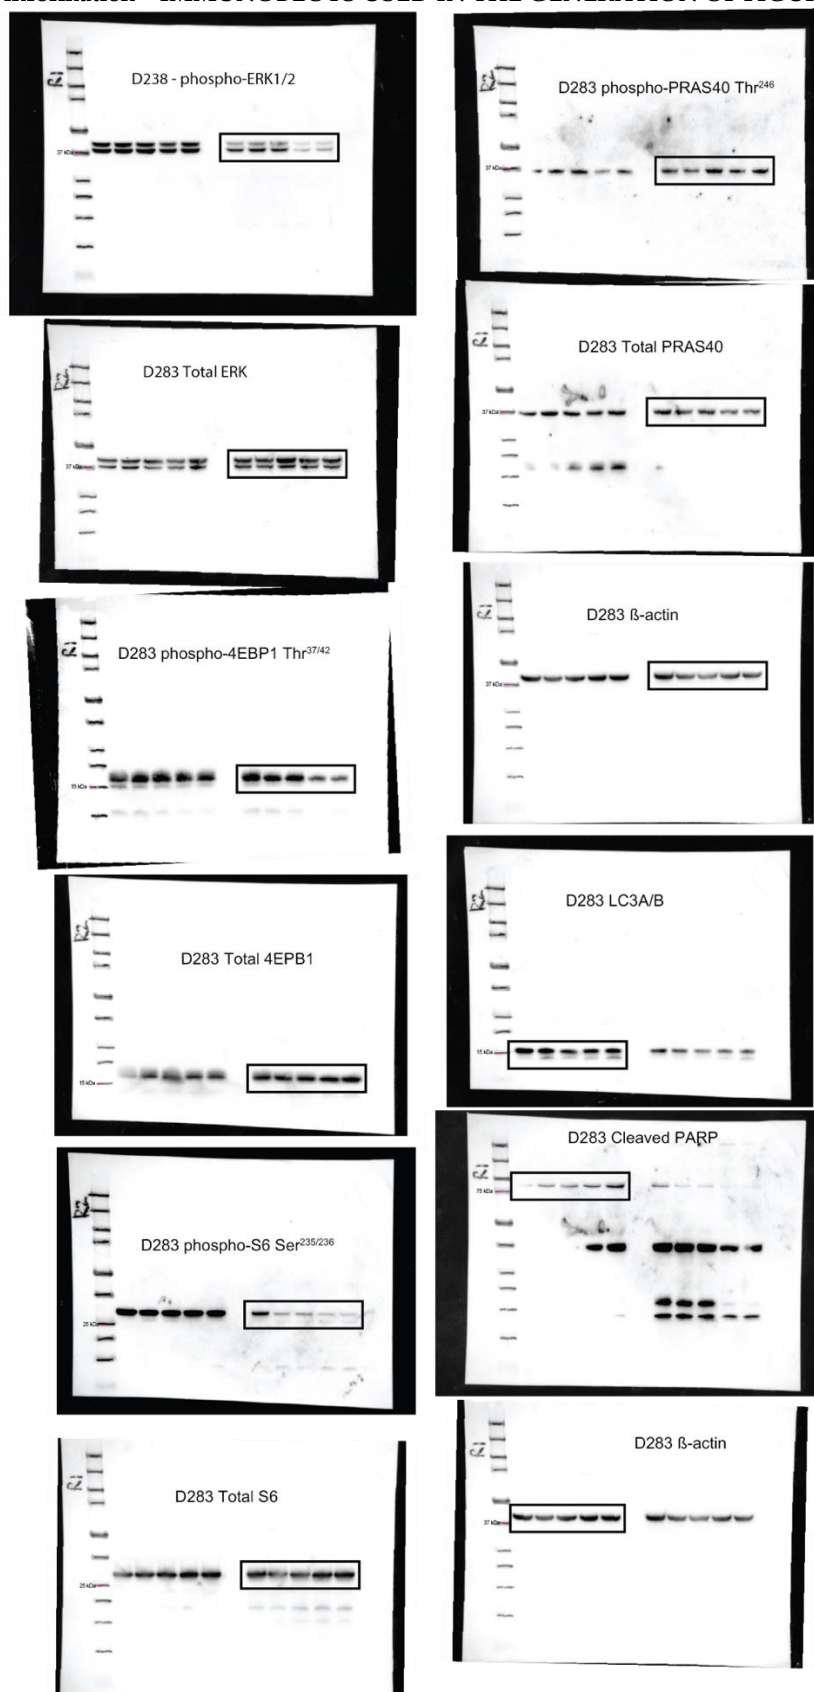

**Supplementary figure W1.** Immunoblots from D283 medulloblastoma cells treated with THC and CBD. Each membrane is labelled with the antibody target used and the sections of the immunoblot used to generate Figure 4 are indicated by the black box.

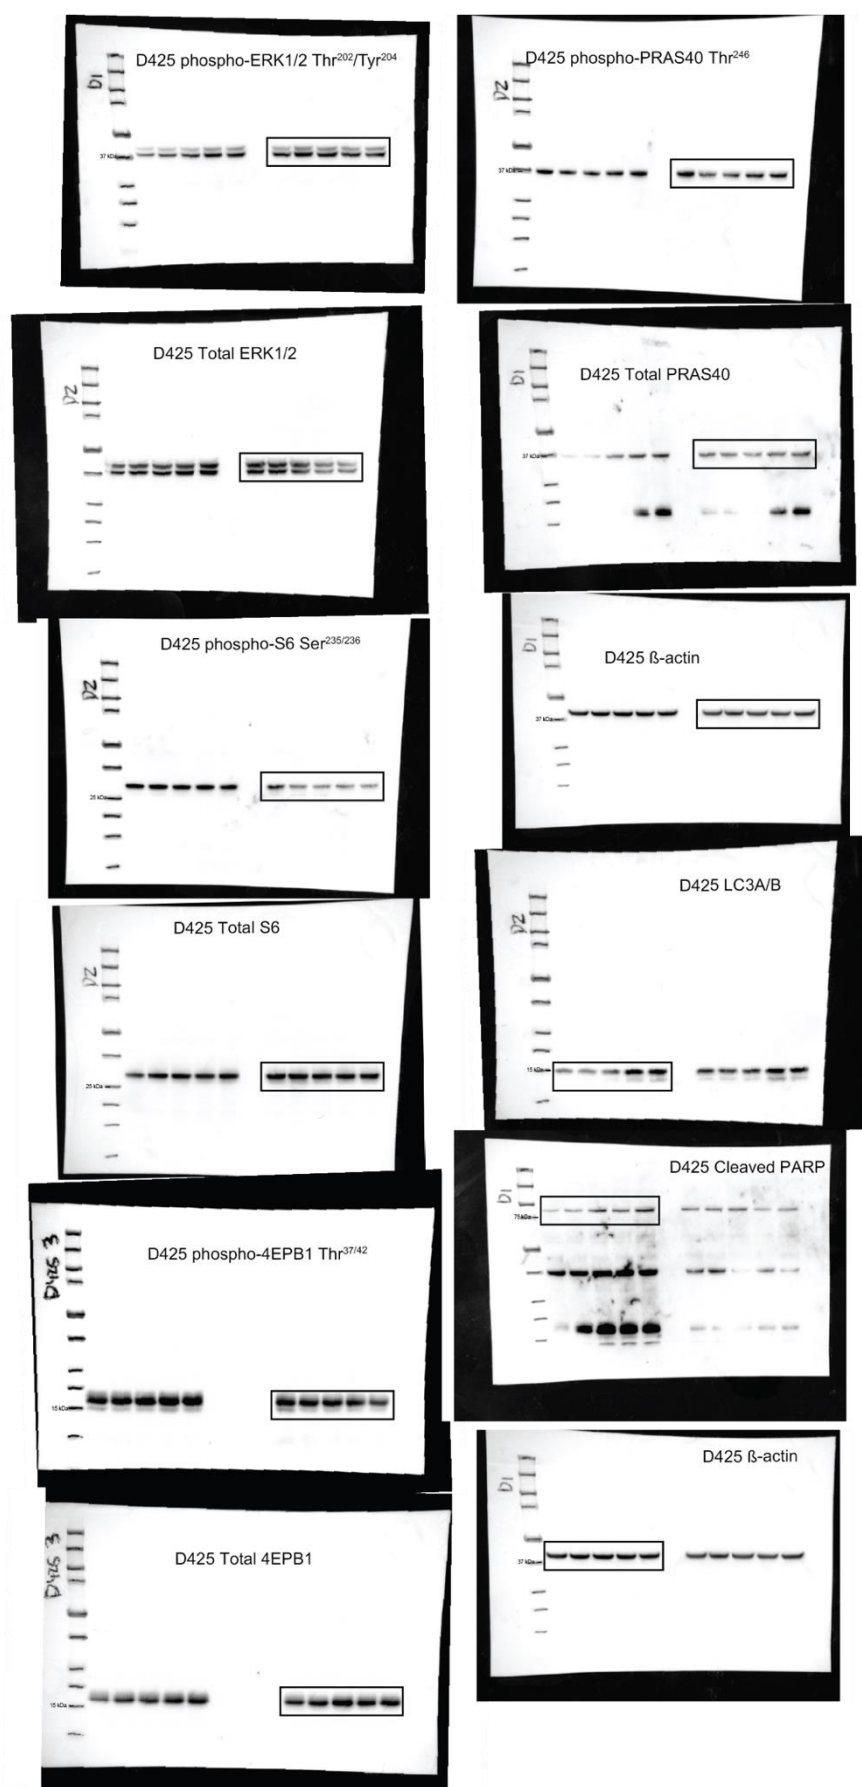

**Supplementary figure W2.** Immunoblots from D425 medulloblastoma cells treated with THC and CBD. Each membrane is labelled with the antibody target used and the sections of the immunoblot used to generate Figure 4 are indicated by the black box.

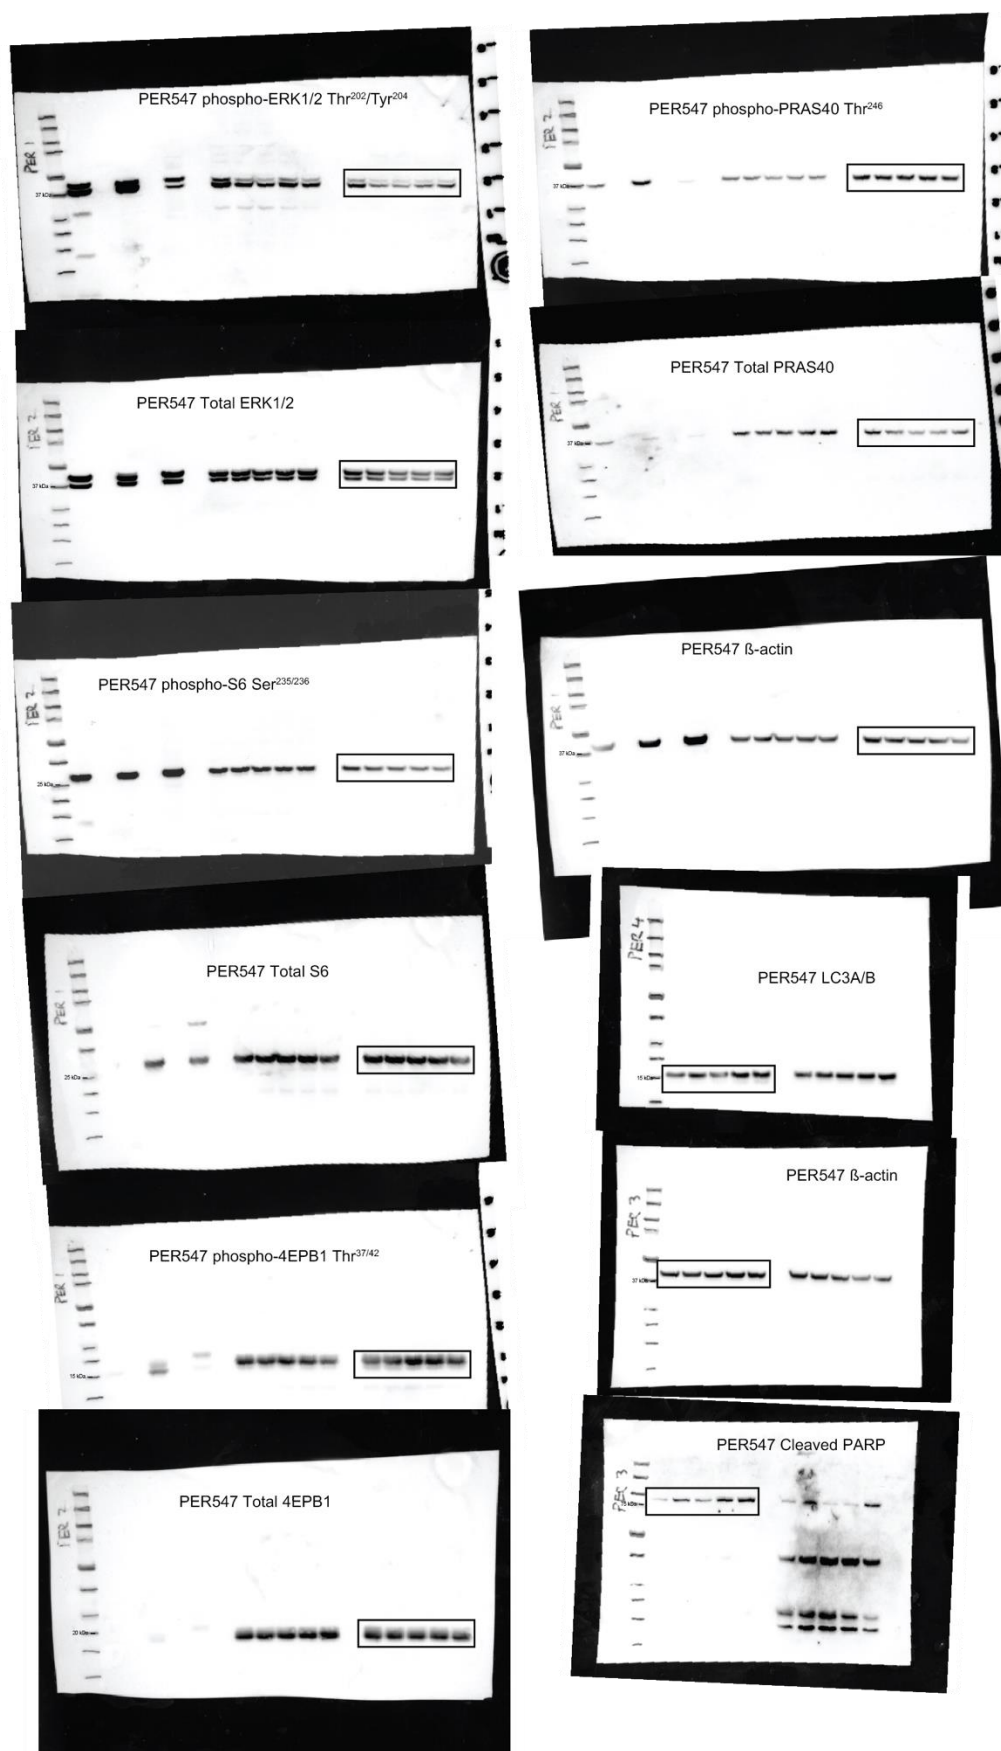

**Supplementary figure W3.** Immunoblots from PER547 medulloblastoma cells treated with THC and CBD. Each membrane is labelled with the antibody target used and the sections of the immunoblot used to generate Figure 4 are indicated by the black box.
